# Supplementary material for: Radiation-activated PD-L1 aptamer-functionalized nanoradiosensitizer to potentiate antitumor immunity in combined radioimmunotherapy and photothermal therapy
Source: Royal Society of Chemistry journal article supplement (doi:10.1039/d4tb01831a), 2024-01-01
Supplement: d4tb01831a1.pdf [file d4tb01831a1.pdf]

## Supplementary Information

### **Radiation-activated PD-L1 aptamer-functionalized nanoradiosensitizer to potentiate antitumor immunity in combined radioimmunotherapy and photothermal therapy**

#### **Author contributions**

Bo Chen<sup>1, ‡</sup>, Yinbo He<sup>2, †</sup>, Long Bai<sup>2, †</sup>, Shulin Pan<sup>1</sup>, Yinggang Wang<sup>1</sup>, Min Mu<sup>3</sup>,

Rangrang Fan<sup>1</sup>, Bo Han<sup>4</sup>, Peter Ernst Huber<sup>5</sup>, Bingwen Zou<sup>3,\*</sup>, Gang Guo<sup>1,\*</sup>

<sup>1</sup> Department of Biotherapy, Cancer Center and State Key Laboratory of Biotherapy,

West China Hospital, Sichuan University, Chengdu, 610041, China

<sup>2</sup> Radiotherapy Physics and Technology Center, Cancer Center, West China Hospital,

Sichuan University, Chengdu, 610041, China

<sup>3</sup> Department of Radiation Oncology and Department of Thoracic Oncology, Cancer Center,

West China Hospital, Sichuan University, Chengdu, Sichuan, China

<sup>4</sup> Key Laboratory of Xinjiang Endemic Phytomedicine Resources Ministry of Education,

Shihezi University College of Pharmacy, Shihezi, 832002, China

<sup>5</sup> Department of Molecular and Radiooncology, German Cancer Research Center (DKFZ),

Department of Radiooncology and Radiotherapy, University Hospital Heidelberg, Heidelberg

Institute for Radiation Oncology (HIRO), Heidelberg, Germany

\* Corresponding author: Gang Guo, E-mail: guogang@scu.edu.cn (G. Guo);

Bingwen Zou, E-mail: zoubingwen81@163.com (B. Zou).

Tel: (86) 028-8516 4063, Fax: +86 28 85164060.

<sup>†</sup> These authors contributed equally to this work.

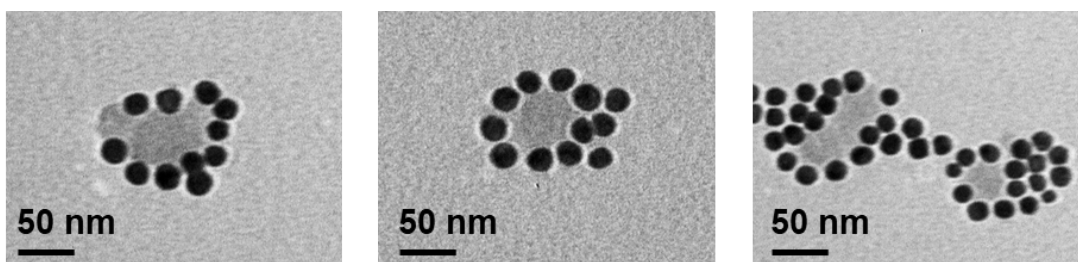

**Figure S1. HR-TEM images of BAPBM NPs.**

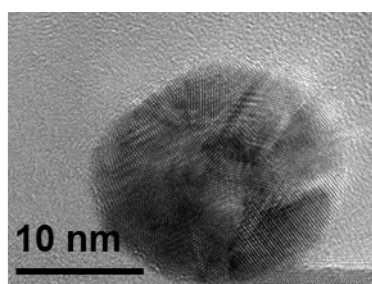

**Figure S2. HR-TEM images of AuNPs.**

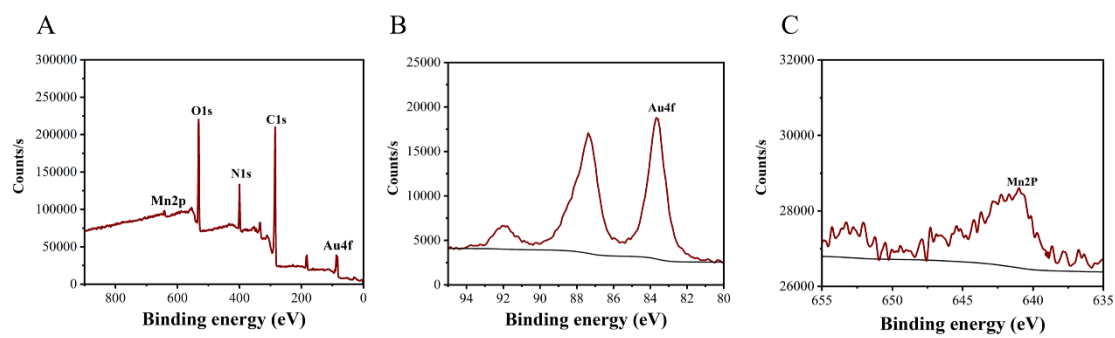

**Figure S3.** X-ray photoelectron spectroscopy (XPS) curve of BAPBM NPs.

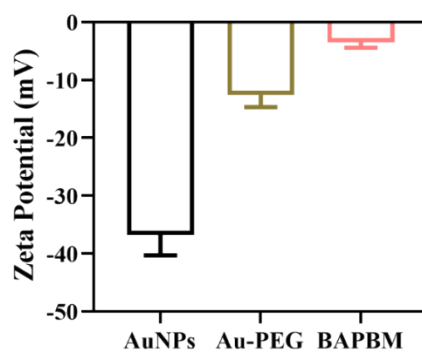

**Figure S4.** The zeta potentials of AuNPs, Au-PEG, and BAPBM NPs.

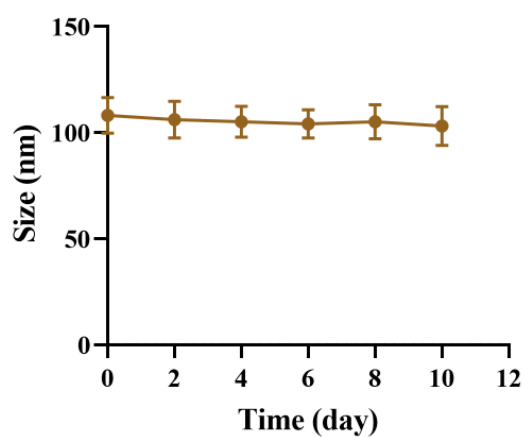

**Figure S5.** Hydrodynamic sizes of BAPBM NPs in PBS (pH=7.4).

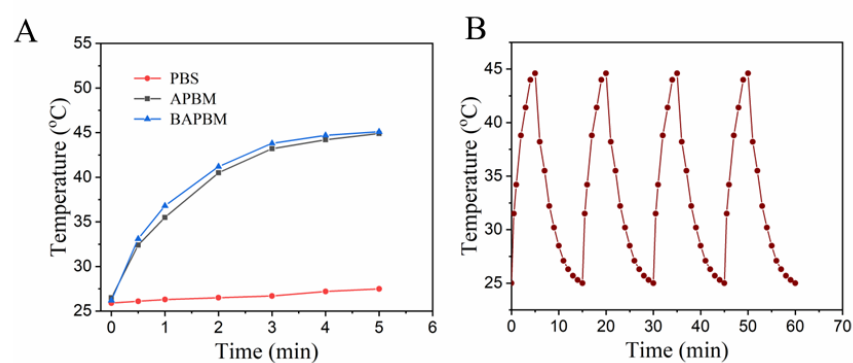

**Figure S6.** (A) Photothermal curves of APBM and BAPBM NPs under 808 nm laser irradiation (0.5 W/cm<sup>2</sup>). (B) Heating/cooling profiles of BAPBM NPs after four on-off laser irradiation.

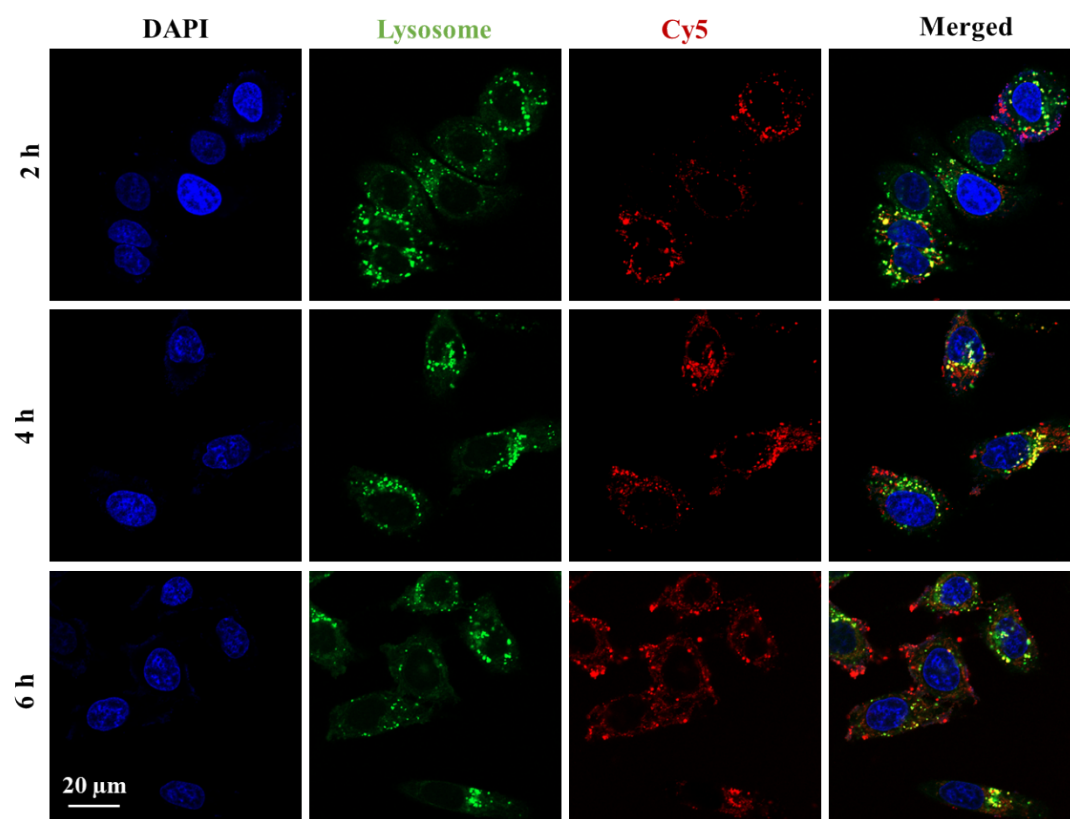

**Figure S7.** Intracellular localization of BAPBM NPs. Scale bar is 20  $\mu\text{m}$ .

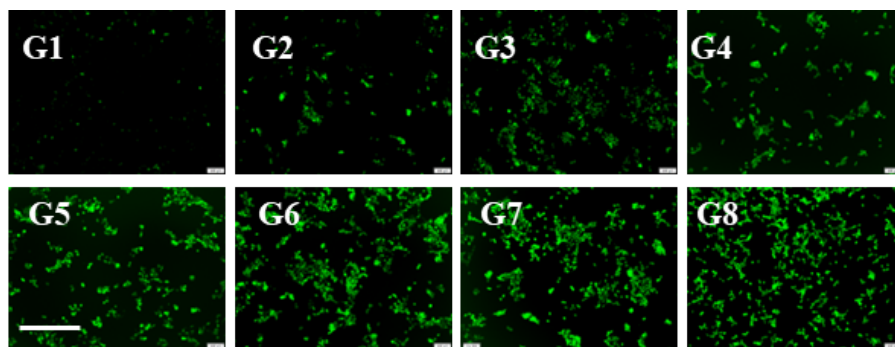

**Figure S8.** Fluorescence images of 4T1 cells treated with different treatments and stained with ROS probe (DCF-DA). The scale bar is 100  $\mu\text{m}$ . G1: PBS; G2: PBS+X-ray; G3: BMS; G4: BMS+X-ray; G5: APBM+X-ray; G6: APBM+X-ray (4 Gy)+NIR (0.5 W/cm<sup>2</sup>, 5 min); G7: BAPBM+X-ray; G8: BAPBM+X-ray+NIR.

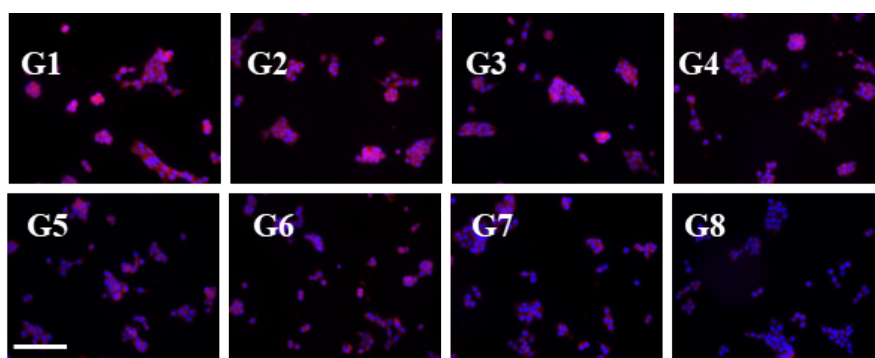

**Figure S9.** Evolution of O<sub>2</sub> in 4T1 cells treated with different treatments and stained with [Ru(dpp)<sub>3</sub>]Cl<sub>2</sub>. Blue fluorescence of DAPI and red fluorescence of [Ru(dpp)<sub>3</sub>]Cl<sub>2</sub>. The scale bar is 100  $\mu\text{m}$ .

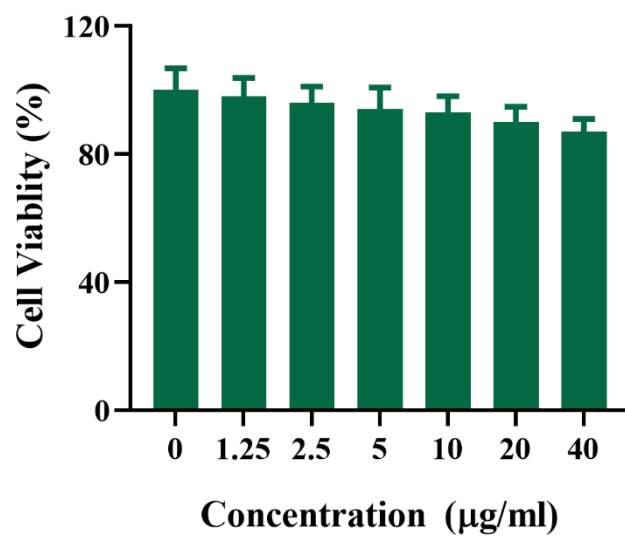

**Figure S10.** The cell viability of BAPBM on HUVECs.

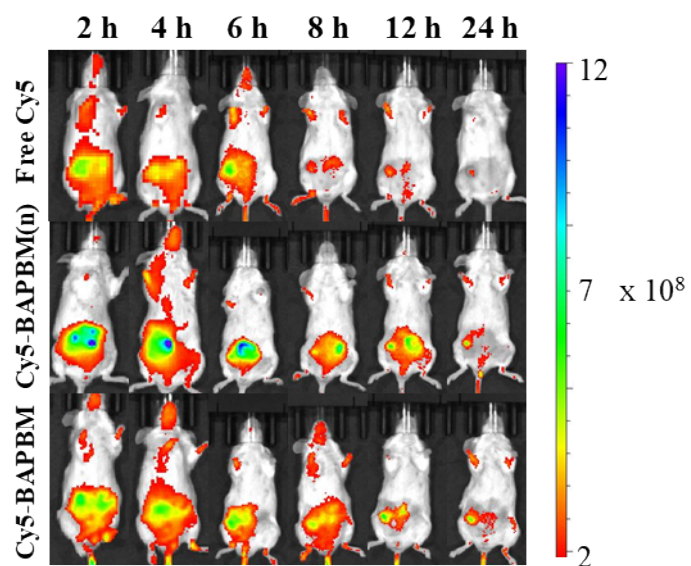

**Figure S11.** *In vivo* biodistribution of different nanoparticles in 4T1-bearing mice. Cy5-BAPBM(n) : Cy5-labeled BAPBM NPs without PD-L1 aptamer; Cy5-BAPBM: Cy5-labeled BAPBM NPs with PD-L1 aptamer.

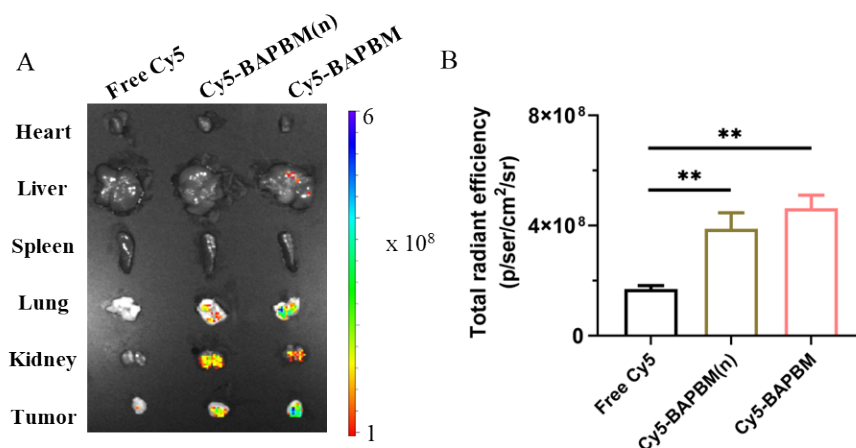

**Figure S12.** (A) *Ex vivo* fluorescence images of major organs. (B) Total radiant efficiency of tumor tissues. Cy5-BAPBM(n): Cy5-labeled BAPBM NPs without PD-L1 aptamer; Cy5-BAPBM: Cy5-labeled BAPBM NPs with PD-L1 aptamer.  $p < 0.05$ , \*\* $p < 0.01$ , \*\*\* $p < 0.001$ .

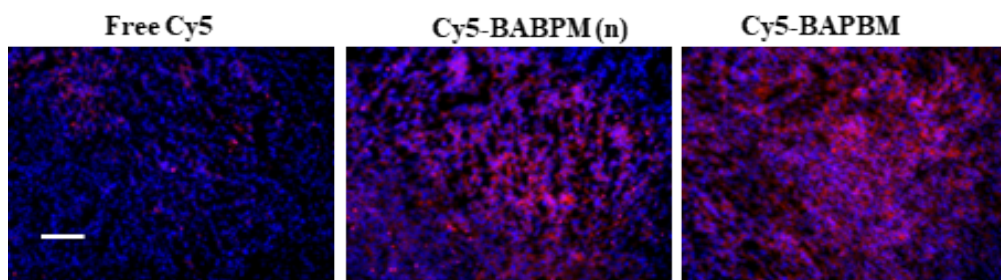

**Figure S13.** CLSM images of excised tumors. Cy5-BAPBM(n): Cy5-labeled BAPBM NPs without PD-L1 aptamer; Cy5-BAPBM: Cy5-labeled BAPBM NPs with PD-L1 aptamer. The scale bar is 100  $\mu$ m.

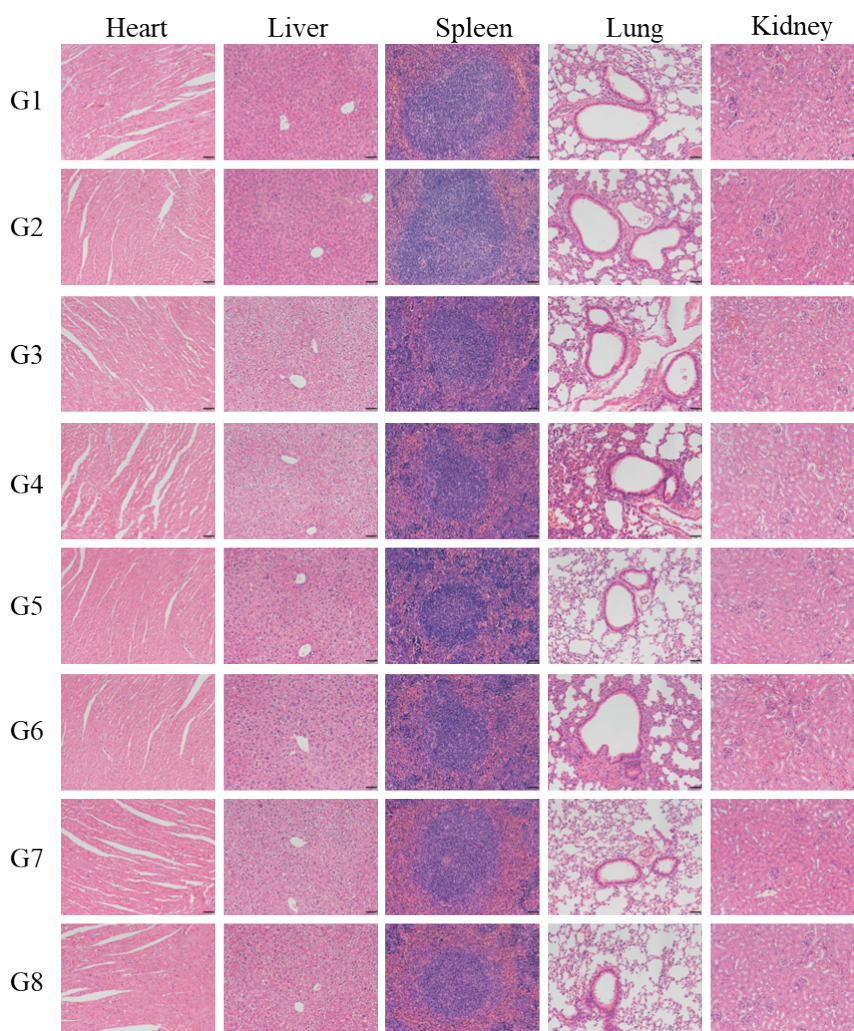

**Fig. S14** H&E staining of the major organs (heart, liver, spleen, lung, kidney, and tumor). The scale bar is 100  $\mu$ m. G1: PBS; G2: PBS+X-ray; G3: BMS; G4: BMS+X-ray; G5: APBM+X-ray; G6: APBM+X-

ray (4 Gy) +NIR (0.5 W/cm<sup>2</sup>, 5 min); G7: BAPBM+X-ray; G8: BAPBM+X-ray+NIR.

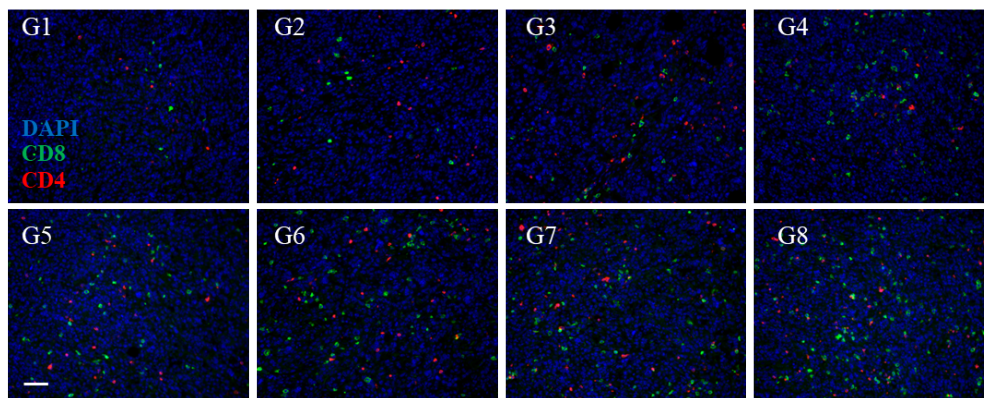

**Figure S15.** Immunofluorescence images (CD4<sup>+</sup> and CD8<sup>+</sup> T cells) of tumor tissues. Green fluorescence of CD8<sup>+</sup> T cells and red fluorescence of CD4<sup>+</sup> T cells. The scale bar is 100  $\mu$ m. G1: PBS; G2: PBS+X-ray; G3: BMS; G4: BMS+X-ray; G5: APBM+X-ray; G6: APBM+X-ray (4 Gy) +NIR (0.5 W/cm<sup>2</sup>, 5 min); G7: BAPBM+X-ray; G8: BAPBM+X-ray+NIR.
